# Supplementary material for: The Rose-comb Mutation in Chickens Constitutes a Structural Rearrangement Causing Both Altered Comb Morphology and Defective Sperm Motility
Source: PubMed Central journal article supplement (PMC3386170; doi:10.1371/journal.pgen.1002775), 2012-06-28
Supplement: pgen.1002775.s009.pdf [file pgen.1002775.s009.pdf]

**Table S1** Fertility data for different matings involving Rose-comb chicken.

|   | Males                                  | Females                                 | # fertile<br>eggs | # infertile<br>eggs | Fertility<br>rate |
|---|----------------------------------------|-----------------------------------------|-------------------|---------------------|-------------------|
|   | Barbezieux <i>rr</i> males (n=15)      | Gauloise Grise <i>rr</i> females (n=30) | 115               | 67                  | 63.2%             |
|   |                                        | Charollaise <i>R1</i> - females (n=30)  | 87                | 87                  | 50.0%             |
|   |                                        | <b>Total (n=60)</b>                     | <b>202</b>        | <b>154</b>          | <b>56.7%</b>      |
| A | Charollaise <i>R1R1</i> males (n=7)    | Gauloise Grise <i>rr</i> females (n=14) | 43                | 37                  | 53.8%             |
|   |                                        | Charollaise <i>R1</i> - females (n=14)  | 19                | 60                  | 24.1%             |
|   |                                        | <b>Total (n=28)</b>                     | <b>62</b>         | <b>97</b>           | <b>39.0%</b>      |
|   | Charollaise <i>R1r</i> males (n=7)     | Gauloise Grise <i>rr</i> females (n=14) | 52                | 26                  | 66.7%             |
|   |                                        | Charollaise <i>R1</i> - females (n=14)  | 39                | 29                  | 57.4%             |
|   |                                        | <b>Total (n=28)</b>                     | <b>91</b>         | <b>55</b>           | <b>62.3%</b>      |
| B | Rhode Island Red <i>rr</i> males (n=2) | White Leghorn <i>rr</i> females (n=10)  | <b>160</b>        | <b>15</b>           | <b>91.4%</b>      |
|   | Alsacienne <i>R2R2</i> males (n=2)     | White Leghorn <i>rr</i> females (n=8)   | <b>141</b>        | <b>19</b>           | <b>88.1%</b>      |
