# Supplementary material for: The Rose-comb Mutation in Chickens Constitutes a Structural Rearrangement Causing Both Altered Comb Morphology and Defective Sperm Motility
Source: PubMed Central journal article supplement (PMC3386170; doi:10.1371/journal.pgen.1002775), 2012-06-28
Supplement: pgen.1002775.s010.pdf [file pgen.1002775.s010.pdf]

**Table S2** Compilation of primer sequences used for the *Rose-comb* locus.

**A. Primers used for microsatellite analysis**

| Marker  | Forward primer               | Reverse primer              | Forward primer with M13 tag                     |
|---------|------------------------------|-----------------------------|-------------------------------------------------|
| MCW0120 | 5'-CTATGTAAAGCTTGAATCTTCA-3' | 5'-ATTCCTGGGTGCTAATTTACC-3' | 5'-CACGACGTTGTAAAACGACCTATGTAAAGCTTGAATCTTCA-3' |
| ADL0107 | 5'-ATTATCCATCCACTTGAGAA-3'   | 5'-TATTTTTTGAACATTACCAG-3'  | 5'-CACGACGTTGTAAAACGACATTATCCATCCACTTGAGAA-3'   |

**B. Primers used for SNP analysis using a TaqMan Genotyping Assay**

| Assay     | Forward Primer                         | Reverse Primer                      | Reporter 1 Dye | Reporter 1 Sequence          | Reporter 1 Quencher | Reporter 2 Dye | Reporter 2 Sequence       | Reporter 2 Quencher |
|-----------|----------------------------------------|-------------------------------------|----------------|------------------------------|---------------------|----------------|---------------------------|---------------------|
| C7C19.217 | 5'-CCCACTTAGAGCATCACAGAAAGA-3'         | 5'-GTGATCGAGCACTGAAAAACAC-3'        | VIC            | 5'-AAAGAAAGTGAGCTTGTC-3'     | NFQ                 | FAM            | 5'-AAAGAAAGTGAACCTTGTC-3' | NFQ                 |
| C7C19.249 | 5'-CATTCCCTAGCAAGGAGAAGCT-3'           | 5'-TCATAGCCTGTCCCCACGAT-3'          | VIC            | 5'-CAAATTGAGCGTTTGTAAAC-3'   | NFQ                 | FAM            | 5'-CAAATTGAGCATTGTAAAC-3' | NFQ                 |
| C7C19.253 | 5'-TTCAGACAAAAATCAAGTCCTCAGAGAT-3'     | 5'-CAGTTAAAATGGTGGACAGATTTGGT-3'    | VIC            | 5'-AACAAGCTAAGAGGTTTC-3'     | NFQ                 | FAM            | 5'-ACAAGCTAAAAGGTTTC-3'   | NFQ                 |
| KIAA1715  | 5'-GCTGGTATCAAAAGTCTATACAACATGAAT-3'   | 5'-ACTCCTTAAGGCAACAAAATCTGT-3'      | VIC            | 5'-TTTTAAAGTTGGTTTATAACAG-3' | NFQ                 | FAM            | 5'-AAGTTGGTTTGTAAACAG-3'  | NFQ                 |
| PTD004    | 5'-GGAGGTAATTTTGCCATAATTTTCTGAAGAAC-3' | 5'-CGCTTTTGGTCTCATGCAATTTTCA-3'     | VIC            | 5'-TCATGAAAGCGTAAGTGT-3'     | NFQ                 | FAM            | 5'-TCATGAAAGCATAAGTGT-3'  | NFQ                 |
| C7C19.442 | 5'-AAGCCAAAAGTGGACATAGTACTC-3'         | 5'-TGTGTGAGGGAGGTCATCCT-3'          | VIC            | 5'-CTGCCCGGTGAGAT-3'         | NFQ                 | FAM            | 5'-CTGCCCGGTGAGAT-3'      | NFQ                 |
| C7C19.559 | 5'-AGCACCTTCCACTGCTTCAT-3'             | 5'-CAGAGCAATGCAATAATCCAAGAATCTAA-3' | VIC            | 5'-CTGAGACTGGAGTAT-3'        | NFQ                 | FAM            | 5'-TGAGACTGGAAAT-3'       | NFQ                 |
| C7C107.36 | 5'-ATGTATTATGCAACTCAATGTGGAGGAA-3'     | 5'-CAGCAGATATTTGGACTTAGCACA-3'      | VIC            | 5'-ATGGGCCATCAAT-3'          | NFQ                 | FAM            | 5'-CATGGGCCCTCAAT-3'      | NFQ                 |
| C7C15.222 | 5'-TGTTTTCTGTTGCCCTGAATGT-3'           | 5'-CCAGAAGGCTAAAACGTCATCTACT-3'     | VIC            | 5'-CGGAGCCTGGGACT-3'         | NFQ                 | FAM            | 5'-CCGAGCCTAGGACT-3'      | NFQ                 |

**C. Primers used for expression analysis**

| Primer name   | Primer sequence      |
|---------------|----------------------|
| GAPDH-1F      | CCCCAATGTCTCTGTTGTT  |
| GAPDH-1R      | GGAACAGAAGTGGCCTCTCA |
| CCDC108-ex15F | GCATGGACTTTTACCCCTGA |
| CCDC108-ex17R | GCCTGACTGTTACTCGCACA |
| CCDC108-ex1aF | AACGGGAGTGATGCTACGTG |
| CCDC108-ex1bF | AAGGGGAGATGTCCTTCC   |
| CCDC108-ex7R  | CTGTGCACCTTTGTGCTGTT |

|               |                        |
|---------------|------------------------|
| MNR2-ex1F     | GCTGGAGAACCAGTTCAAGC   |
| MNR2-ex2R     | CATCGTCCTCCTCTTCCTCA   |
| FKBP7-ex1F    | AAGGGGGACCTGCTGAAC     |
| FKBP7-ex3R    | ATGCTTCAACACTGCGAGGT   |
| PLEKHA3-ex4F  | TTCACCACGATGAGACTTGC   |
| PLEKHA3-ex7R  | CCGGAGGAGTATCGCTGTAA   |
| PLEKHA3-ex1aF | GGAAGGAGTCCTGTACAAGTGG |
| PLEKHA3-ex3R  | GTGTTGTCTGTTGCATGGACTT |
| PLEKHA3-ex2bF | ATCCTCGAGAAAGGCACAGA   |
| PLEKHA3-ex2R  | GCCTTTGCAAACATCATCCT   |

#### D. Primers used for RACE analysis

| Primer name      | Primer sequence           |
|------------------|---------------------------|
| PLEKHA-5RACE-1R  | ATGTTCTCAATGCTGGGAGGAGAGC |
| PLEKHA-5RACE-2R  | CTGCTAAACAGGCCTTTGCACTTC  |
| FKBP7-5RACE-1R   | TTTGGTGGAATCTTGCCCTGTGC   |
| FKBP7-5RACE-2R   | TCCGTTTTTCTCCAGGACAC      |
| CCDC108-5RACE-1R | ACACGTTGCTATCACGTTGCACACC |
| CCDC108-5RACE-2R | GTGCTCAGGAGTCATGGAGAAGG   |
| PLEKHA3-3RACE-1F | GTGCCTACTAGCACCTTGATCCAT  |
| PLEKHA3-3RACE-2F | CAGTGCTGTCACTTGTGCTCAGTTC |
| FKBP7-3RACE-1F   | GCAGTAAATAAGGGACCTCGCAGTG |
| FKBP7-3RACE-2F   | AGAAGAACGACCACGATGGAGATG  |
| CCDC108-3RACE-1F | GCAGATAGTGACGGACCTGCTGATA |
| CCDC108-3RACE-2F | AGCAAAGACCCAACACAGAGGACAG |
