# Supplementary material for: The Rose-comb Mutation in Chickens Constitutes a Structural Rearrangement Causing Both Altered Comb Morphology and Defective Sperm Motility
Source: PubMed Central journal article supplement (PMC3386170; doi:10.1371/journal.pgen.1002775), 2012-06-28
Supplement: pgen.1002775.s011.pdf [file pgen.1002775.s011.pdf]

**Table S3** Genomic coordinates of BACs used for FISH imaging. BAC BW27C3 has been screened for a genetic marker (MCW201) in the indicated location, but the precise extent of the BAC is unknown, as the ends have not been sequenced.

| BAC ID      | galGal3 Location       |
|-------------|------------------------|
| CH261-95H11 | chr7:16391149-16620754 |
| TAM32-24B23 | chr7:16860577-17007780 |
| BW27C3      | chr7:22476221-22476531 |
| CH261-5G3   | chr7:23742304-23936571 |
