# Supplementary material for: The Rose-comb Mutation in Chickens Constitutes a Structural Rearrangement Causing Both Altered Comb Morphology and Defective Sperm Motility
Source: PubMed Central journal article supplement (PMC3386170; doi:10.1371/journal.pgen.1002775), 2012-06-28
Supplement: pgen.1002775.s012.pdf [file pgen.1002775.s012.pdf]

**Table S4** Diagnostic PCR-based screening of breakpoints associated with the *Rose-comb* alleles.

A. Primer sequences for breakpoint analysis PCR

| Primer         | Sequence               | Strand in WT |
|----------------|------------------------|--------------|
| Rose-16.5-out  | CAGAGCCCCCAGCGAA       | +            |
| Rose-16.5-in   | GAAGTGAAACGGCCGTGAG    | -            |
| Rose-23.79     | GCTGTTGATGCTGCTGGTG    | -            |
| Rose-23.88-in  | CTGTCTGTGAGGCATTTCCAGT | +            |
| Rose-23.88-out | CTAAATACCTGCCCTTCCTGA  | -            |

B. PCR mix for breakpoint analysis

| Reagent                                             | Volume ( $\mu$ l) |
|-----------------------------------------------------|-------------------|
| 5X Kapa2G GC Buffer w/ 1.5mM MgCl <sub>2</sub>      | 2                 |
| dNTPs (20 mM)                                       | 0.1               |
| Rose-16-out (10 $\mu$ M)                            | 0.2               |
| Rose-16-in (10 $\mu$ M)                             | 0.3               |
| Rose-23.79 (10 $\mu$ M)                             | 0.1               |
| Rose-23-in (10 $\mu$ M)                             | 0.4               |
| Rose-23-out (10 $\mu$ M)                            | 0.4               |
| Kapa2G Robust HotStart DNA Polymerase (5U/ $\mu$ l) | 0.08              |
| DNA (10 ng/ $\mu$ l)                                | 1                 |
| dd H <sub>2</sub> O                                 | 5.42              |
| Total                                               | 10                |

C. PCR cycle conditions for breakpoint analysis

| Temp | Time |
|------|------|
| 95°C | 5:00 |
| 95°C | 0:30 |

|       |      |      |              |
|-------|------|------|--------------|
| 26x   | 68°C | 0:30 | -0.5°C/cycle |
|       | 72°C | 1:00 |              |
| <hr/> |      |      |              |
| 9x    | 95°C | 0:30 |              |
|       | 55°C | 0:30 |              |
|       | 72°C | 1:00 |              |
|       | 72°C | 7:00 |              |
| <hr/> |      |      |              |
|       | 8°C  | ∞    |              |

#### D. Result breakdown for breakpoint analysis

| Genotype: | <i>R1R2</i> | <i>R1R1</i> | <i>R2R2</i> | <i>rr</i> | <i>R2r</i> | <i>R1r</i> |                                  | Primer1     | Primer2     |
|-----------|-------------|-------------|-------------|-----------|------------|------------|----------------------------------|-------------|-------------|
|           | 155         | 155         |             |           |            | 155        | 23.89 <i>R1</i> inversion band   | Rose-23-out | Rose-16-in  |
|           | 240         |             | 240         | 240       | 240        | 240        | 23.89 <i>r/R2</i> band           | Rose-23-in  | Rose-23-out |
|           | 350         |             | 350         |           | 350        |            | 23.79 <i>R2</i> duplication band | Rose-23.79  | Rose-16-in  |
|           |             |             |             | 482       | 482        | 482        | 16.5 <i>r</i> band               | Rose-16-out | Rose-16-in  |
|           | 561         | 561         | 561         |           | 561        | 561        | 16.5 <i>R1/R2</i> inversion band | Rose-16-out | Rose-23-in  |
